# Supplementary material for: CO2condensation onto alkanes: unconventional cases of heterogeneous nucleation
Source: Royal Society of Chemistry journal article supplement (doi:10.1039/c9cp00967a), 2019-01-01
Supplement: c9cp00967a1.pdf [file c9cp00967a1.pdf]

## Supplementary Material for “CO<sub>2</sub> condensation onto alkanes: Unconventional cases of heterogeneous nucleation”

Yensil Park<sup>1</sup> and Barbara E. Wyslouzil<sup>\*,1,2</sup>

<sup>1</sup>William G. Lowrie Department of Chemical and Biomolecular Engineering, Ohio State University, Columbus, Ohio 43210, USA

<sup>2</sup>Department of Chemistry and Biochemistry, Ohio State University, Columbus, Ohio 43210, USA

### Corresponding Author

\*Email: wyslouzil.1@osu.edu (BEW)

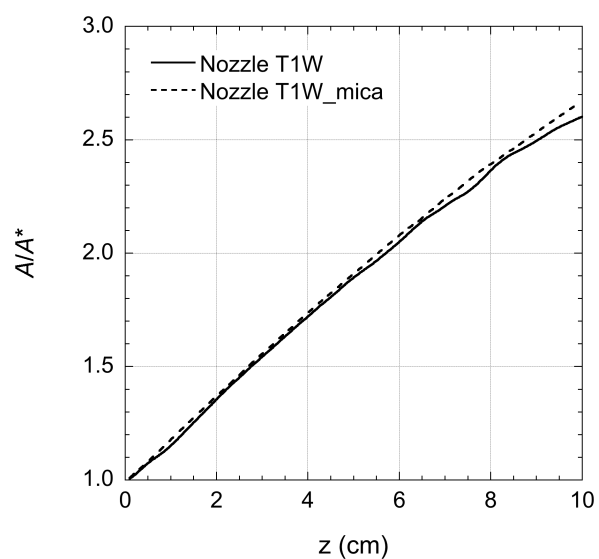

**Figure S1.** Effective area ratio ( $A/A^*$ ) of the nozzle T1 with CaF<sub>2</sub> windows for PTM and FTIR measurements, and with mica windows for SAXS measurements.

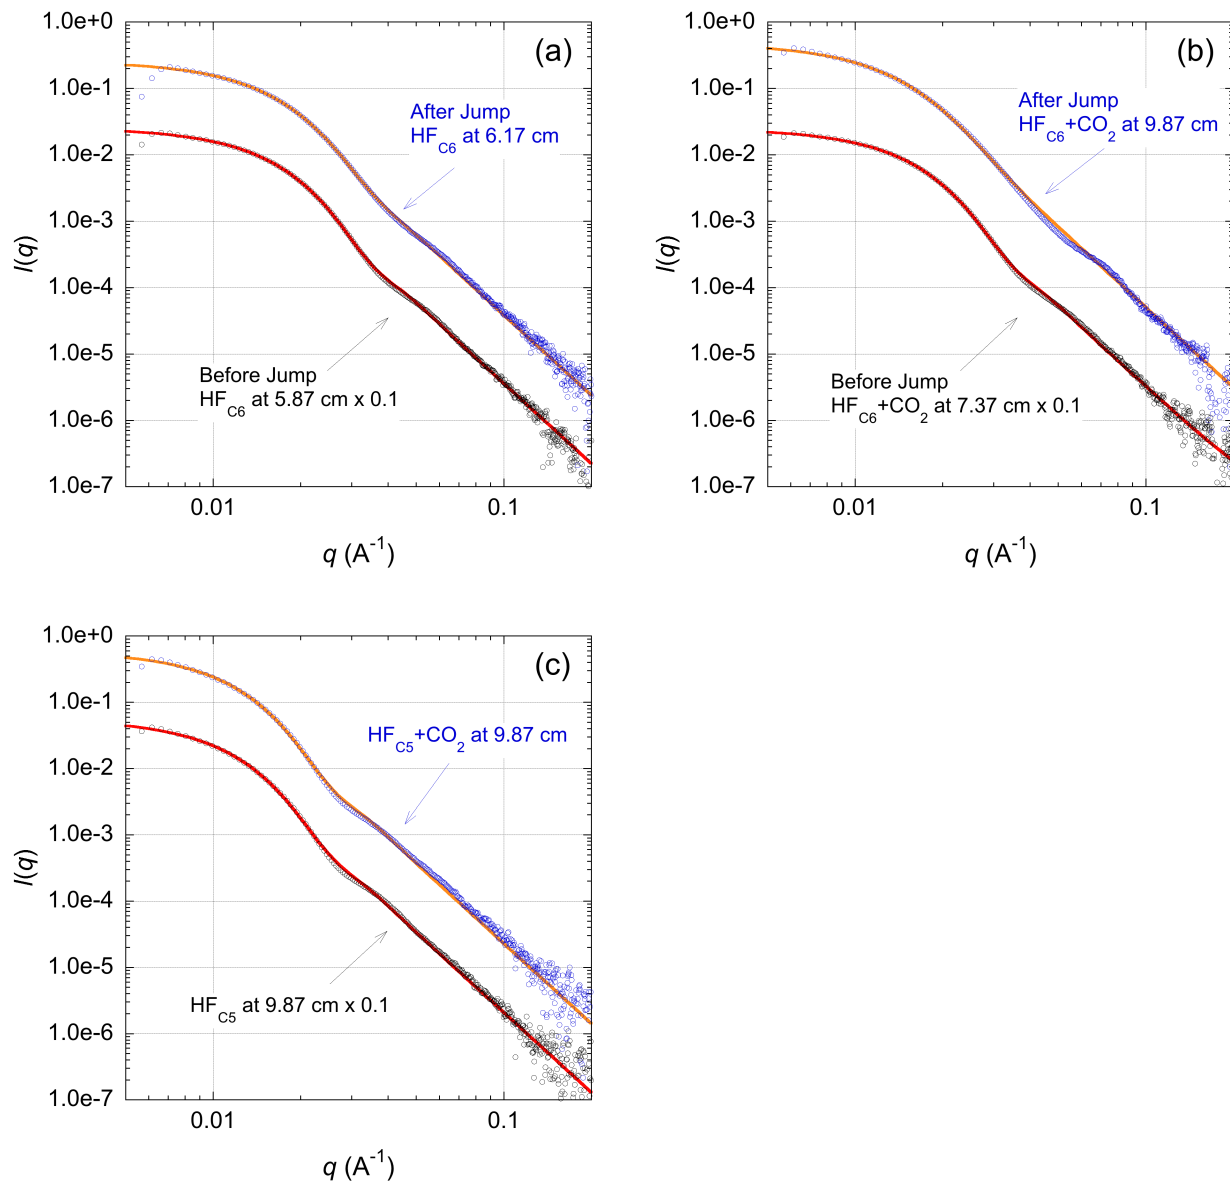

**Figure S2.** Typical SAXS experimental curves and the best fits to them under the assumption that scattering is from a polydisperse collection of spheres. Comparison between before and after the particle size "jump" occurs (a) in HF<sub>C6</sub> and (b) in HF<sub>C6</sub>+CO<sub>2</sub> conditions. (c) Experimental results from SAXS measurements near the exit of the nozzle and their fits in HF<sub>C5</sub> and HF<sub>C5</sub>+CO<sub>2</sub> conditions.

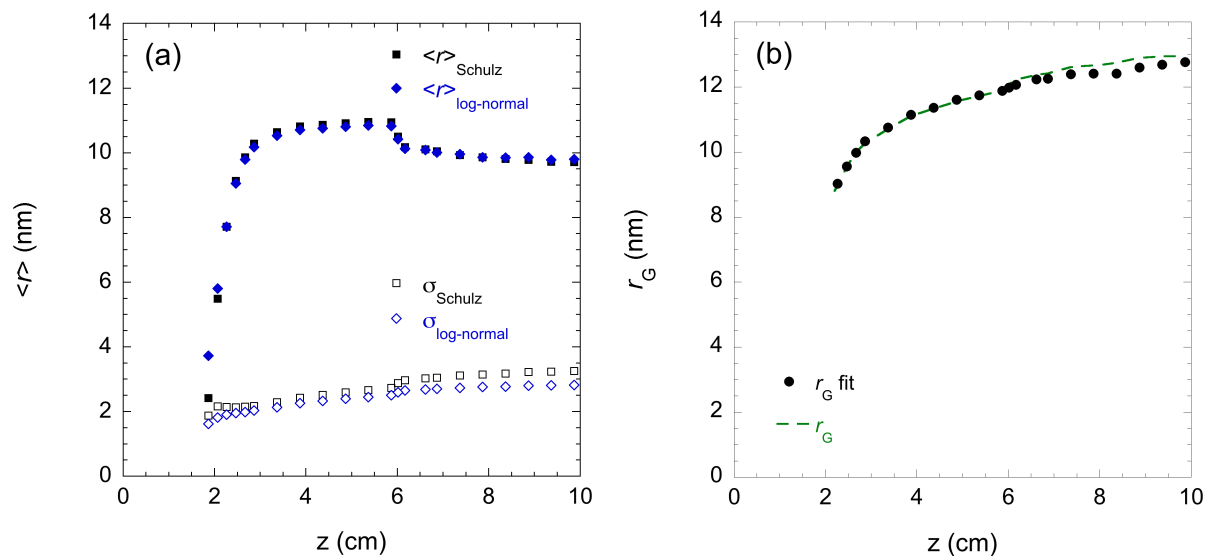

**Figure S3.** (a) Average particle size  $\langle r \rangle$  and the distribution width ( $\sigma$ ) determined for the HF<sub>C6</sub> experiment. The results are not particularly sensitive to the choice of underlying size distribution function, i.e. Schulz versus log-normal. (b) The radius of gyration ( $r_G$ ) from the Guinier fit at low  $q$  region (black circles) and  $r_G$  determined from the fit parameters (dashed line) show very close results.

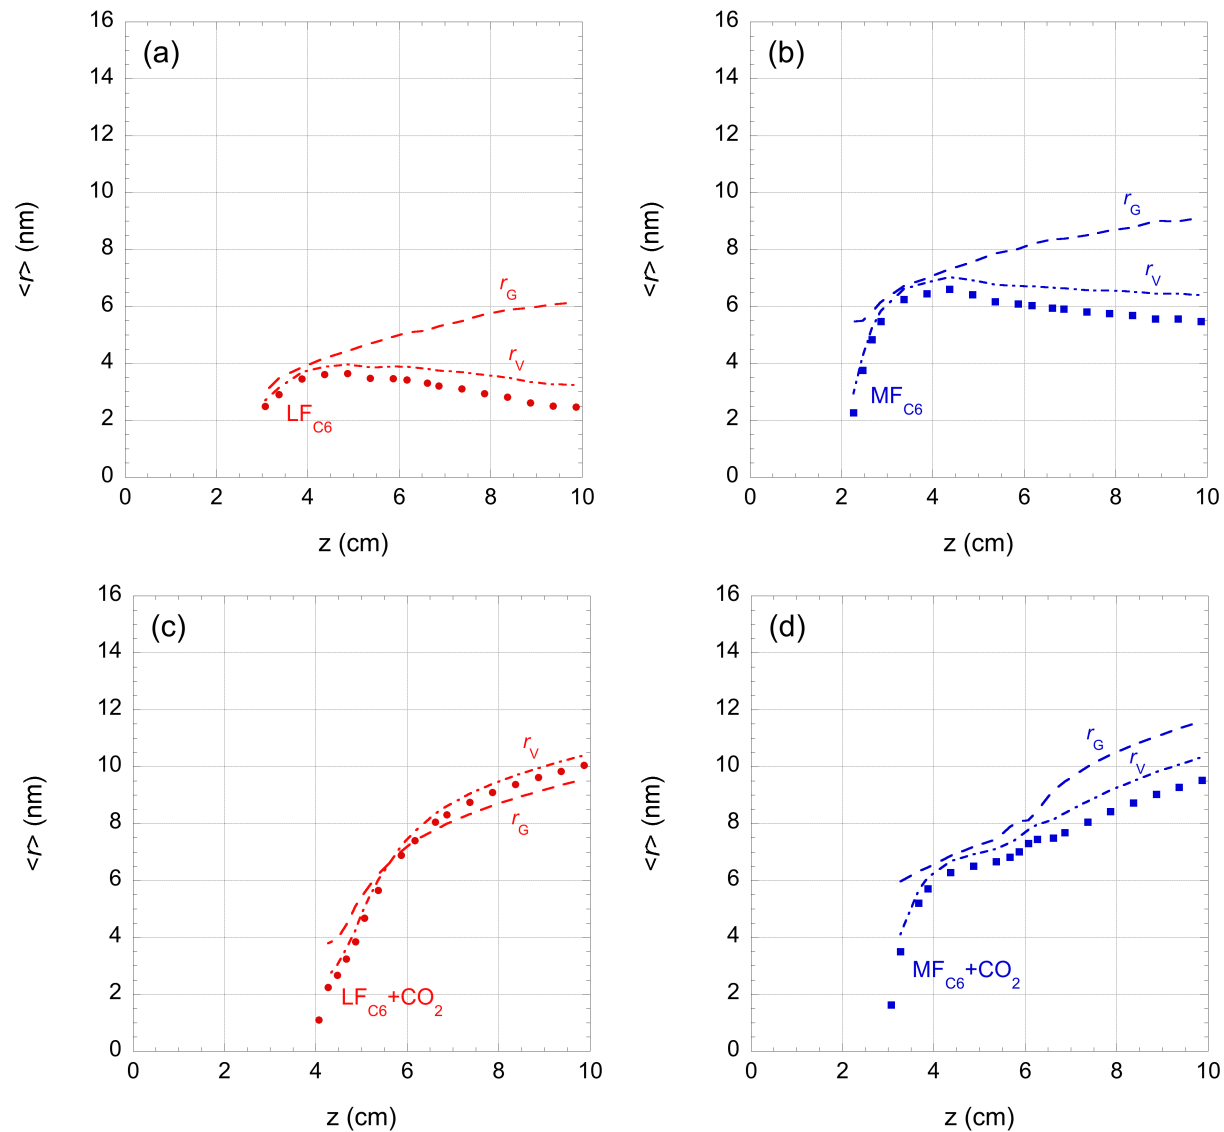

**Figure S4.** The number average particle radii  $\langle r \rangle$  determined from SAXS measurements for (a)  $LF_{C6}$ , (b)  $MF_{C6}$ , (c)  $LF_{C6}+CO_2$ , and (d)  $MF_{C6}+CO_2$  are compared to the volume average radius  $r_V$  (dash-dot line) and the radius of gyration  $r_G$  (dashed line). The latter two values are derived from the fit parameters.

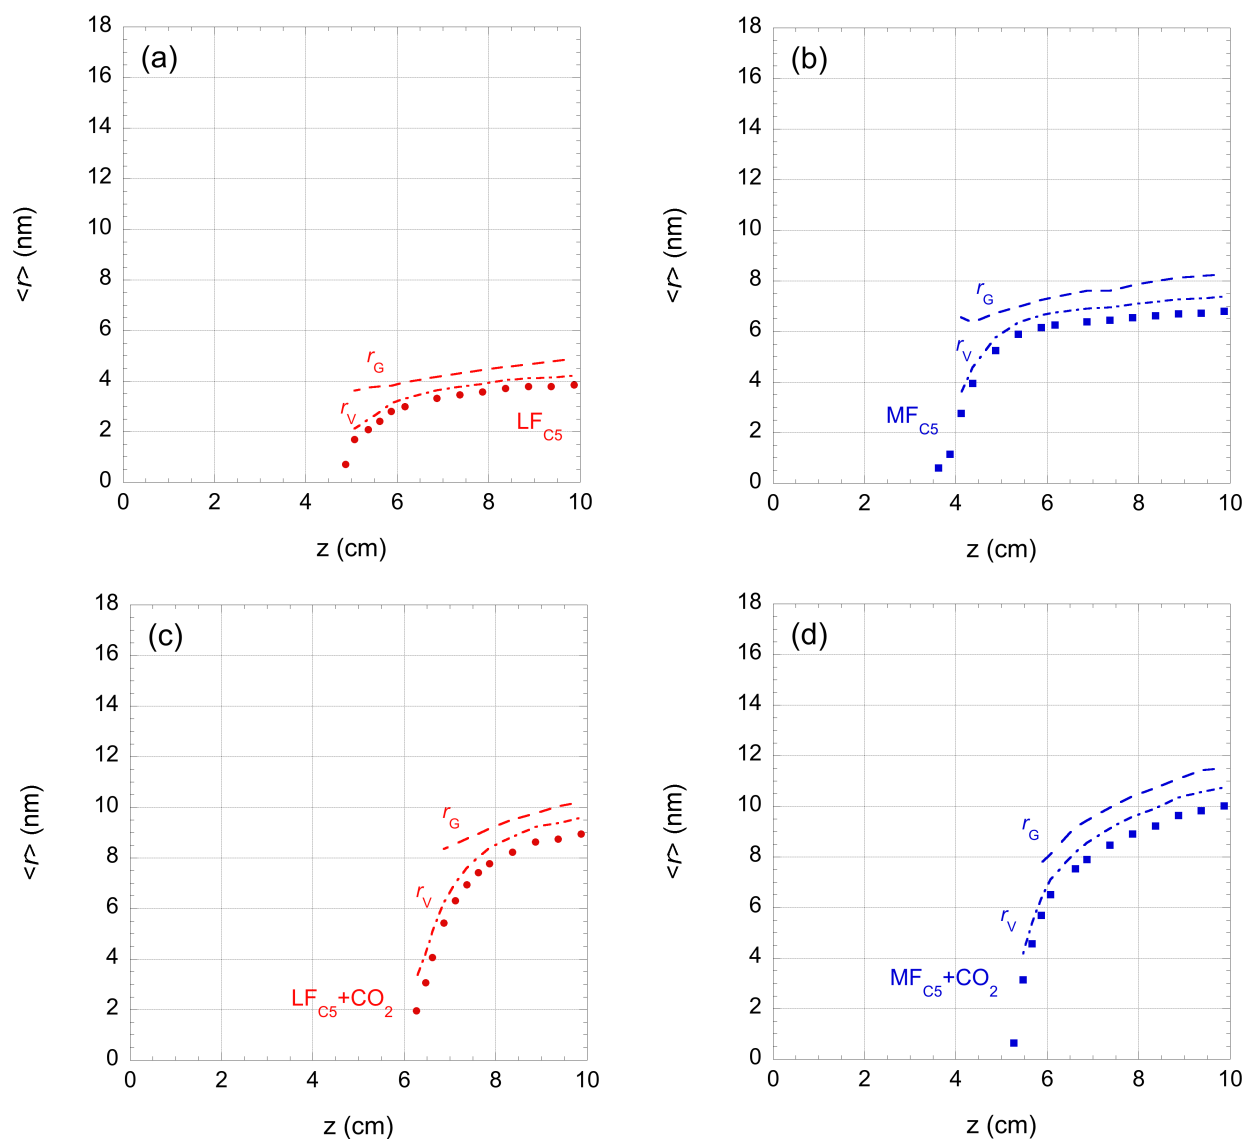

**Figure S5.** The number average particle radii  $\langle r \rangle$  determined from SAXS measurements for (a)  $LF_{C5}$ , (b)  $MF_{C5}$ , (c)  $LF_{C5}+CO_2$ , and (d)  $MF_{C5}+CO_2$  are compared to the volume average radius  $r_V$  (dash-dot line) and the radius of gyration  $r_G$  (dashed line). The latter two values are derived from the fit parameters.

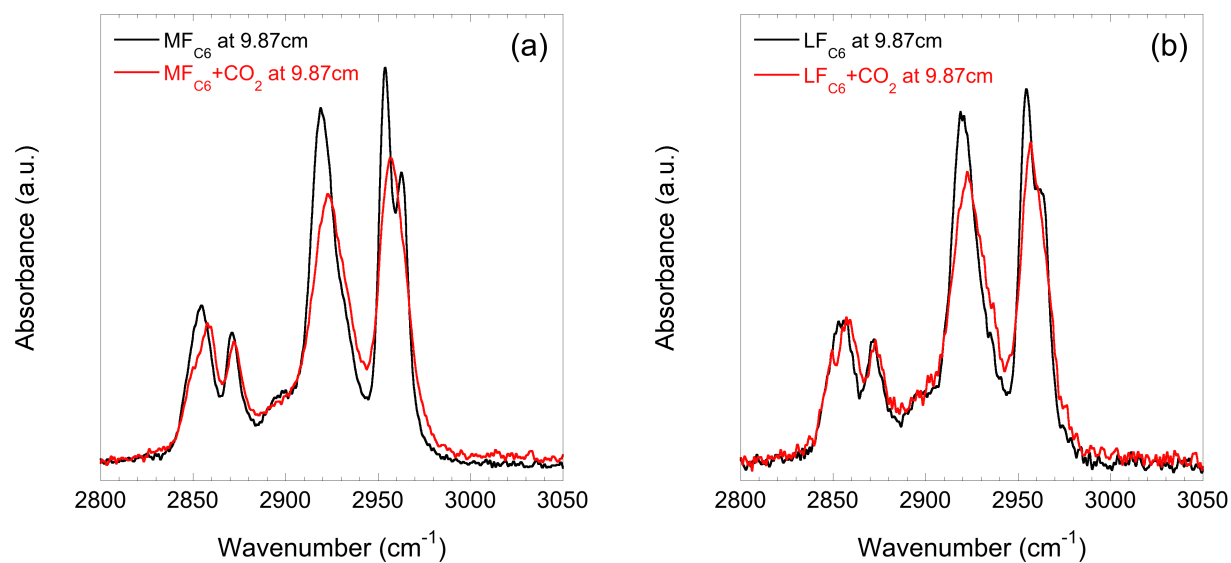

**Figure S6.** Spectra were baseline corrected and adjusted for the density of the flow but not scaled otherwise. Total absorbance of (a) MF<sub>C6</sub> (black) and MF<sub>C6</sub>+CO<sub>2</sub> (red) and (b) LF<sub>C6</sub> (black) and LF<sub>C6</sub>+CO<sub>2</sub> (red) between 2800 cm<sup>-1</sup> and 3050 cm<sup>-1</sup> near the exit of the nozzle. In both cases n-hexane does not freeze in the presence of CO<sub>2</sub>.
